# Supplementary material
Source: publisher site journal article supplement (https://www.dovepress.com/get_supplementary_file.php?f=451698.docx)
Supplement: Supplementary file 1 [file get_supplementary_file.php]

**Supplementary Table S1 ESAS at Baseline and 24 hours**

|  | **PCSA group**  **Median(IQRs)** | |  | **Oxycontin group**  **Median(IQRs)** | |  |
| --- | --- | --- | --- | --- | --- | --- |
| **ESAS** | **Baseline** | **24h Titration** | ***P value*** | **Baseline** | **24h Titration** | ***P value*** |
| Pain | 8(7-10) | 2(0-3) | 0.01 | 8(7-10) | 2(1-3) | 0.01 |
| Tiredness | 5(4-6) | 3(1-3) | 0.32 | 5(4-6) | 3(1-4) | 0.42 |
| Nausea | 2(1-4) | 2(1-3) | 1.00 | 2(1-4) | 2(1-3) | 1.00 |
| Depression | 2(1-3) | 2(1-3) | 1.00 | 3(1-4) | 2(1-3) | 0.83 |
| Anxiety | 4(4-5) | 3(2-4) | 0.86 | 4(4-5) | 3(2-3) | 0.86 |
| Drowsiness | 2(1-3) | 1(1-3) | 0.68 | 3(1-3) | 2(1-3) | 0.78 |
| Appetite | 5(4-6) | 5(4-6) | 1.00 | 6(4-6) | 5(4-6) | 0.92 |
| Well-being | 6(6-7) | 4(4-6) | 0.66 | 6(6-7) | 5(4-7) | 0.92 |
| Itching | 1(0-1) | 1(0-1) | 1.00 | 1(0-1) | 1(0-1) | 1.00 |
| Dyspnea | 2(1-2) | 1(0-2) | 0.92 | 1(0-2) | 1(0-2) | 1.00 |
| Overall score | 37(30-47) | 24(22-28) | 0.03 | 39(30-49) | 26(22-29) | 0.04 |

Abbreviations: IQRs,interquartile ranges; ESAS,Edmonton symptom assessment system; NRS,numeric rating scales;PCSA，Patient-controlled subcutaneous analgesia

**Supplementary Table S2. Adverse effects of two groups**

| **Adverse Effect** | **PCSA group** | **Oxycontin group** | ***p value*** |
| --- | --- | --- | --- |
| Total | 128 | 128 |  |
| Nausea | 9 | 10 | 0.82 |
| Vomiting | 5 | 5 | 0.96 |
| Constipation | 45 | 42 | 0.73 |
| Somnolence | 2 | 3 | 0.87 |
| Dizziness | 6 | 8 | 0.74 |
| Dyspnea | 0 | 0 | 1.00 |

Abbreviations: PCSA，Patient-controlled subcutaneous analgesia
